# Supplementary material for: Combination of anxiety and depression is associated with an increased headache frequency in migraineurs: a population-based study
Source: Springer Nature journal article supplement (doi:10.1186/s12883-014-0238-4), 2014-12-01
Supplement: MOESM3 [file 9742164]

Gallup Omnibus 2011-310-014

2011 12월 옴니버스 조사

|  |  |  |  |  |
|--|--|--|--|--|
|  |  |  |  |  |
|--|--|--|--|--|

?

저는 한국갤럽조사연구소에서 조사원으로 일하는 ○○○입니다.  
 이번 저희 연구소에서는 **과 관련된 여러 가지 문제에 대한 의견을** 알아보고 있습니다.  
 제가 묻게 되는 질문에는 맞고 틀리는 답이 없으며, ○○님의 의견은 이런 의견을 갖고 있는 사람이 몇 퍼센트 (%)라는 식으로  
 통계를 내는 데에만 사용되며, 그 외의 목적에는 절대로 사용되는 일이 없으니 느끼시는 대로 말씀해 주시면 됩니다.  
 잠시만 시간을 내어 협조해 주시면 감사하겠습니다.

- **지 역 :** 01) 울 02) 부 산 03) 대 구 04) 인 천 05) 광 주 06) 대 전  
 6-7   07) 울 산 08) 경 기 09) 강 원 10) 충 북 11) 충 남 12) 전 북  
 13) 전 남 14) 경 북 15) 경 남

■ **지점번호 :** 8-10

■ **지역크기 :** 11 1. 2. 중소 도시 3. 읍 4. 면

■ **성 별 :** 12 1. 남성 2. 여성

2011 12월  
 한국갤럽조사연구소  
 소장 박 무 익  
 담당연구원 정 지 연 / 장 덕 현  
 실사연구원 박 주 희  
 주 소 서울시 종로구 사직동 208  
 전 화 02-3702-2681

SQ 3) 실례지만 ○○님의 나이(연세)는 올해 만으로 어떻게 되십니까? 생일을 고려하지 않고, 우리나라 나이에서 한 살을 뺀 만 나이로 응답해 주십시오.

올해 만 나이와 출생년도를 모두 적어 주십시오.

13-14 만   세 ( 19   년생 ) 15-16

SQ 4) 조사원 다음은 질문하지 말고 SQ3)에 따라 체크하십시오.  
 연령대

- 17
- |               |               |
|---------------|---------------|
| 1. 만 19 - 29세 | 4. 만 50 - 59세 |
| 2. 만 30 - 39세 | 5. 만 60세 이상   |
| 3. 40 - 49세   |               |

SQ 5) 조사원 다음은 질문하지 말고 체크하십시오.  
 조사 지역

- 18
- 인접 동 등 지정 동 이외 지역 진행
  - 지정 동 내 진행

SQ 6) ○○님의 직업은 무엇입니까?

19-20

- 농업·수산업·축산업(가족종사자 포함)
- (종업원 9명 이하의 소규모 업소 주인 및 가족 종사자, 약국, 개인택시운전자)
- 판매직·서비스직(상점점원, 세일즈맨, 보험설계사 등)
- 기능공·숙련공(중장비·트럭 운전자, 전자·가전제품 A/S 기술자, 숙련공 등)
- 일반직업직(토목 관계의 현장 작업, 청소, 수위, 육체 노동 등)
- 사무직·기술직(일반회사 사무직, 기술직, 유치원·학교 교사, 회사에 소속된 웹디자이너·컴퓨터 프로그래머 등)
- 경영관리직(5급 이상의 고급공무원, 교장, 기업체 부장 이상의 직위 등)
- 전문직(대학교수, 변호사, 의사, 회계사, 종교인, 언론인, 예술가, 고소득 프리랜서 등)
- 가정주부
- 학생(고등학생, 대학생, 대학원생)
- 무직
- 은퇴
- 기타 (적을 것: \_\_\_\_\_ )

**‘두통’에 대한 질문입니다.**

19) ○○ 님께서는 1년간 두통을 1분 이상 경험하신 적이 있으십니까?

B65

- 1.
2. 아니오 → **6** 문 29)로 가십시오

문 20) ○○ 님께서 경험하신 두통은 평균적으로 얼마나 오래 갔습니까? 두통 때마다 약을 드신다면 약을 복용하지 않은 상태에서 두통이 지속된 시간을 말씀해 주십시오.

평균   시간   분  
66-67                      68-69

문 21) ○○ 님께서는 평소 두통을 얼마나 자주 경험하십니까? 다음 중 ○○ 님께서 두통을 경험하시는 빈도를 가장 잘 표현하는 항목을 한 가지만 골라 구체적으로 해당 기간 동안 몇 회 정도 경험하시는지 말씀해 주십시오.

1. 1년에 (                      )회 70-71
2. 1달에 (                      )회 72-73
3. 1주일에 (                      )회 74-75
4. 1일에 (                      )회 76-77
5. 1시간에 (                      )회 78-79

문 22) (보기카드 6 제시)  
 ○○ 님께서 경험하신(혹은 느끼고 계신) 두통은 어느 정도였습니까? 다음 중에서 말씀해 주십시오.

1. 두통이 있기는 하지만 일상 활동에 지장을 주지는 않는 정도
2. 두통으로 일상 활동에 지장이 있기는 하지만 할 수 있는 정도
3. 두통으로 인하여 일상 활동을 할 수 없는 정도

문 23) (보기카드 7 제시)  
 그림, 두통 정도를 ‘통증이 없는 상태’ 0점, ‘상상할 수 있는 가장 심한 통증’ 10점으로 볼 때 ○○ 님께서 경험하신 두통은 평균적으로 1점에서 10점 사이에서 어느 정도인지 말씀해 주십시오.

C6-7

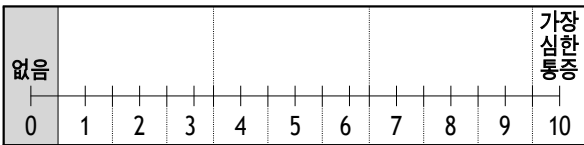

문 24) ○○ 님께서는 두통을 느끼실 때 머리 어느 부위가 특히 아프십니까? (단수응답)

1. 오른쪽
2. 왼쪽
3. 양쪽
4. 머리 전체
5. 번갈아가며 한 쪽만
6. 아플 때 마다 여기저기 부위가 바뀐다
7. 기타(적을 것: \_\_\_\_\_)

문 25) ○○ 님께서 느끼신 두통의 증세는 어떠했습니까?  
 ○○ 님께서 두통을 경험하실 때의 느낌을 구체적인 말로 표현해 주십시오.(자유응답)

10-12

문 26) (보기카드 8 제시)  
 그림, ○○ 님께서 **지난 1년간** 경험하신 두통 증세에 맞는 내용을 다음 중에서 **모두** 말씀해 주십시오.(복수응답)

- 13 1. 심장 뛰듯이 욱신거리거나 지끈거린다
- 14 2. 머리가 터질 것 같이 아프다
- 15 3. 머리가 누르거나 조이거나 또는 띠를 두른 것 같다
- 16 4. 바늘로 순간적으로 콧속 찌르듯이 아프다
- 17 5. 망치로 머리를 내려치는 것 같이 순간적으로 심한 두통이 발생한다
- 18-19 6. 기타(적을 것: \_\_\_\_\_)

문 27) (보기카드 9 제시)  
 ○○ 님께서는 다음 각 증세를 경험한 적이 있으십니까, 혹은 없으십니까?

○ - ○ 각각에 대해 질문하시고, ○와 ○ 증세 경험자에게는 지난 3개월간 총 경험일수도 질문하십시오.

| 증세                                                                                                                                       | 예 | 아니오 | 경험일수                      |
|------------------------------------------------------------------------------------------------------------------------------------------|---|-----|---------------------------|
| ① 체하면 머리가 아프다 <span style="float: right;">20</span>                                                                                      | 1 | 2   |                           |
| ② 두통이 있을 때 속이 메스꺼운다 <span style="float: right;">21</span>                                                                                | 1 | 2   |                           |
| ③ 두통이 있을 때 구토가 나타난다 <span style="float: right;">22</span>                                                                                | 1 | 2   |                           |
| ④ 평소 아무렇지 않게 느껴졌던 빛이나 밝은 곳이 거슬리거나 불편하게 느껴진다 <span style="float: right;">23</span>                                                        | 1 | 2   |                           |
| ⑤ 머리가 아플 때 움직이거나 계단을 걷는 것과 같은 일상적인 활동에 의해 두통이 악화된다 <span style="float: right;">24</span>                                                 | 1 | 2   |                           |
| ⑥ 두통이 있을 때 평소 아무렇지 않게 느껴졌던 소음들이 불편하게 들린다 <span style="float: right;">25</span>                                                           | 1 | 2   |                           |
| ⑦ 두통이 있을 때 평소 아무렇지 않게 느껴졌던 냄새가 다르거나 불편하게 느껴진다 <span style="float: right;">26</span>                                                      | 1 | 2   |                           |
| ⑧ 두통이 있거나 있기 몇 분 전에 눈앞에 불빛이 번쩍거리거나, 별 같은 것이 보이거나, 지그재그로 형태의 선이 보이거나, 사물의 일부가 흐릿하게 보이지 않게 되는 현상이 있다 <span style="float: right;">27</span> | 1 | 2   |                           |
| ⑨ 두통이 있을 때나 있기 전에 어지럼을 느낀다 <span style="float: right;">28</span>                                                                         | 1 | 2   |                           |
| ⑩ 망치로 두들겨 맞은 듯한 심한 두통이 갑자기 시작된 적이 있었다 <span style="float: right;">29</span>                                                              | 1 | 2   |                           |
| ⑪ 머리 한쪽으로 나타나는 심한 두통이 하루 4시간 이하로 거의 매일 연속해서 7일 이상 나타난 적이 있다 <span style="float: right;">30</span>                                        | 1 | 2   |                           |
| ⑫ <b>지난 3개월 동안</b> 두통 때문에 직장이나 학교에서 결근, 결석하거나 집안일을 하지 못한 적이 있다 <span style="float: right;">31</span>                                     | 1 | 2   | 3개월 중 _____ 일<br>33-34    |
| ⑬ <b>지난 3개월 동안</b> 두통 때문에 학교나 직장에서 업무에 장애가 있거나, 집안일을 잘 하지 못한 적이 있다 <span style="float: right;">32</span>                                 | 1 | 2   | 지난 3개월 중 _____ 일<br>35-36 |

28) ( 10 제시)

○○ 님께서는 다음 각 항목을 얼마나 자주 경험하십니까? 각 항목별로 ‘한 번도 그런 적이 없다’, ‘드물게 그렇다’, ‘때때로 그렇다’, ‘자주 그렇다’, ‘항상 그렇다’ 중에서 말씀해 주십시오.

|                   |            |            |           |           |
|-------------------|------------|------------|-----------|-----------|
| 번도<br>그런 적이<br>없다 | 드물게<br>그렇다 | 때때로<br>그렇다 | 자주<br>그렇다 | 항상<br>그렇다 |
| 1                 | 2          | 3          | 4         | 5         |

|                                                  |   |   |   |   |   |     |
|--------------------------------------------------|---|---|---|---|---|-----|
| ① 두통이 있을 때, 통증이 심하다고 느낀다                         | 1 | 2 | 3 | 4 | 5 | C37 |
| ② 두통 때문에 집안일, 직장일, 학교 또는 사회활동 등 일상생활에 지장을 받는다    | 1 | 2 | 3 | 4 | 5 | 38  |
| ③ 두통이 있을 때 누워서 쉬고 싶을 때가 있다                       | 1 | 2 | 3 | 4 | 5 | 39  |
| ④ <b>지난 4주 동안</b> , 두통 때문에 일이나 일상생활을 못할 정도로 피곤했다 | 1 | 2 | 3 | 4 | 5 | 40  |
| ⑤ <b>지난 4주 동안</b> , 두통 때문에 짜증이나 신경질이 났다          | 1 | 2 | 3 | 4 | 5 | 41  |
| ⑥ <b>지난 4주 동안</b> , 두통 때문에 일이나 일상생활에 집중하기 힘들었다   | 1 | 2 | 3 | 4 | 5 | 42  |

응답자에게 질문

문 29) (보기카드 11 제시)

○○ 님 가족이나 친척들 중에 두통으로 고생하시는 분이 계십니까? (계시면) 다음 중 해당되는 분을 **모두** 말씀해 주십시오.(복수응답)

- 43 1.
- 44 2. 할머니
- 45 3. 아버지
- 46 4. 어머니
- 47 5. 남자 형제
- 48 6. 여자 자매
- 49 7. 자식
- 50 8. 사촌 형제 자매
- 51 9. 삼촌
- 52 10. 고모
- 53 11. 외삼촌
- 54 12. 이모
- 55 13. 조카
- 56-57 14. 기타(적을 것: \_\_\_\_\_)
- 58 99. 두통으로 고생하는 가족/친척이 없다

문 30) 다음은 사람들이 자신을 표현하는데 사용하는 내용입니다. 각 항목에 대해 ○○ 님의 경우를 ‘그렇다’, ‘아니다’로 응답해 주십시오.

| 내용                                                                            | 그렇다 | 아니다 |    |
|-------------------------------------------------------------------------------|-----|-----|----|
| ① 나는 절벽에 서 있는 기분이다                                                            | 1   | 0   | 59 |
| ② 나는 걱정을 많이 하는 편이다                                                            | 1   | 0   | 60 |
| ③ 나는 쉽게 짜증을 낸다                                                                | 1   | 0   | 61 |
| ④ 나는 마음을 가라앉히기가 어렵다                                                           | 1   | 0   | 62 |
| ⑤ 나는 잠을 제대로 자지를 못한다                                                           | 1   | 0   | 63 |
| ⑥ 나는 머리가 아프거나 목이 빠근하다                                                         | 1   | 0   | 64 |
| ⑦ 나는 몸이 떨리거나, 저리거나, 갑자기 어지럽거나, 땀이 나거나, 소변이 자주 마렵고, 설사를 하는 등의 증세 중 한 가지 이상이 있다 | 1   | 0   | 65 |
| ⑧ 나는 건강에 대하여 걱정을 많이 한다                                                        | 1   | 0   | 66 |
| ⑨ 나는 잠들기가 어렵다                                                                 | 1   | 0   | 67 |

귀하의 지난 한 달 평상시 수면 습관에 대해 여쭙겠습니다.

문 31) **지난 한 달 동안**, 평균 몇 시에 잠자리에 드셨습니까? 주중과 휴일 기준으로 각각 말씀해 주십시오.

- ① 주중 (오전/오후 \_\_\_\_\_ 시 \_\_\_\_\_ 분)
- ② 휴일 (오전/오후 \_\_\_\_\_ 시 \_\_\_\_\_ 분)

문 32) **지난 한 달 동안**, 평균 몇 시에 잠자리에서 일어나셨습니까? 주중과 휴일 기준으로 각각 말씀해 주십시오.

- ① 주중 (오전/오후 \_\_\_\_\_ 시 \_\_\_\_\_ 분)
- ② 휴일 (오전/오후 \_\_\_\_\_ 시 \_\_\_\_\_ 분)

문 33) **지난 한 달 동안**, 하루 평균 몇 시간 정도 주무셨습니까? 주중과 휴일 기준으로 각각 말씀해 주십시오.

- ① 주중 ( \_\_\_\_\_ 시간 \_\_\_\_\_ 분)
- ② 휴일 ( \_\_\_\_\_ 시간 \_\_\_\_\_ 분)

문 34) ○○ 님께서는 본인의 수면 시간이 충분하다고 생각하십니까, 혹은 충분하지 않다고 생각하십니까?

- 1. 충분하다 ▶ 7페이지 문 36)으로 가십시오
- 2. 충분하지 않다

문 35) (충분하지 않다면)

○○ 님께서 원하시는 수면 시간은 몇 시간 정도입니까?

\_\_\_\_\_ 시간 \_\_\_\_\_ 분 정도

응답자에게 질문

36) **한 달 동안**, 잠이 오지 않아 수면제를 복용하신 경험이 있습니까, 혹은 없습니까?(처방약 또는 약국에서 구입한 약)

D19

- 1.
2. **없다** ▶ **문 38)로 가십시오**

문 37) 그럼, **지난 한 달 동안** 잠들기 위해 **얼마나 자주** 약을 드셨습니까?(처방약 또는 약국에서 구입한 약)

20

1. 한 주에 한 번보다 적게
2. 한 주에 한두 번 정도
3. 한 주에 세 번 이상

조사원 모든 응답자에게 질문

문 38) (보기카드 12 제시)  
일상생활 중 지나치게 졸리면 어떻게 대응하십니까?  
다음 중에서 **모두** 말씀해 주십시오.(복수응답)

- 21 1. 커피 및 카페인 음료를 마신다
- 22 2. 담배를 피운다
- 23 3. 운동을 한다
- 24 4. 낮잠(토막잠)을 잔다
- 25-26 5. 기타(적을 것: \_\_\_\_\_)
- 27 6. **없다**

조사원 문 39)와 문 40)은 SQ3의 가정주부, 무직, 은퇴를 제외하고 질문. 그 외의 분들은 문 41)로 가십시오.

문 39) ○○ 님께서는 평소 몇 시에 직장(일터)이나 학교에 출근/등교하십니까?

( 오전 / 오후 ) \_\_\_\_\_ 시 \_\_\_\_\_ 분  
28 29-30 31-32

문 40) ○○ 님은 교대 근무를 하십니까?

- 33 1. 예
2. 아니오

조사원 모든 응답자에게 질문

문 41) **지난 3개월 동안**, 안전 부주의로 인한 사고 경험이 있습니까, 혹은 없습니까? 가벼운 안전 사고도 포함하여 말씀해 주십시오.

- 34 1. 있다
2. **없다**

문 42) (보기카드 13 제시)

다음 상황에서 ○○ 님께서 단지 **피곤함을 느끼는 것이 아니라 졸리거나 잠이 들 가능성이 얼마나 됩니까?**

평상시의 생활을 생각하시고 말씀해 주십시오.

최근 다음과 같은 상황이 없더라도, 그런 상황에 놓이면 어떻게 될 지 가정해서 응답해 주십시오.

아래의 점수를 기준으로 각 상황에서 가장 적당한 점수를 말씀해 주십시오.

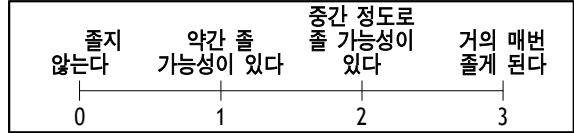

|                                 |   |   |   |   |    |
|---------------------------------|---|---|---|---|----|
| ① 앉아서 책을 읽을 때                   | 0 | 1 | 2 | 3 | 35 |
| ② TV 시청할 때                      | 0 | 1 | 2 | 3 | 36 |
| ③ 공공 장소에서 가만히 앉아있을 때 (극장, 모임 등) | 0 | 1 | 2 | 3 | 37 |
| ④ 승객으로 한 시간 동안 멈추지 않고 차를 타고 갈 때 | 0 | 1 | 2 | 3 | 38 |
| ⑤ 오후 시간에 잠이 나 누워서 휴식을 취할 때      | 0 | 1 | 2 | 3 | 39 |
| ⑥ 앉아서 누군가와 대화를 나눌 때             | 0 | 1 | 2 | 3 | 40 |
| ⑦ 술이 없는 점심 식사 후 조용히 앉아있을 때      | 0 | 1 | 2 | 3 | 41 |
| ⑧ 운전 중에 교통이 정체되어 몇 분간 멈춰 서 있을 때 | 0 | 1 | 2 | 3 | 42 |

문 43) (보기카드 14 제시)

**지난 한 달 동안** 다음 이유로 잠자는데 **얼마나 자주** 문제가 있었습니까?

‘한 번도 없었다’, ‘한 주에 한 번보다 적게’, ‘한 주에 한두 번 정도’, ‘한 주에 세 번 이상’ 중에서 말씀해 주십시오.

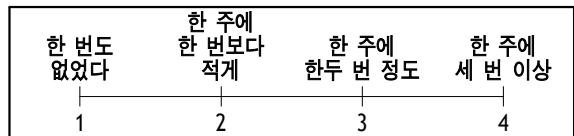

|                                                 |   |   |   |   |    |
|-------------------------------------------------|---|---|---|---|----|
| ① 30분 이내로 잠들 수 없다                               | 1 | 2 | 3 | 4 | 43 |
| ② 한밤중이나 새벽에 깬다                                  | 1 | 2 | 3 | 4 | 44 |
| ③ 화장실에 가려고 일어난다                                 | 1 | 2 | 3 | 4 | 45 |
| ④ 편안하게 숨 쉴 수 없다                                 | 1 | 2 | 3 | 4 | 46 |
| ⑤ 기침을 하거나 시끄럽게 코를 곤다                            | 1 | 2 | 3 | 4 | 47 |
| ⑥ 심한 추위를 느낀다                                    | 1 | 2 | 3 | 4 | 48 |
| ⑦ 심한 더위를 느낀다                                    | 1 | 2 | 3 | 4 | 49 |
| ⑧ 나쁜 꿈을 꾸다                                      | 1 | 2 | 3 | 4 | 50 |
| ⑨ 통증이 있다                                        | 1 | 2 | 3 | 4 | 51 |
| ⑩ 그 외에 잠자는데 다른 문제가 있다면 말씀해 주십시오.<br>_____ 52-53 |   |   |   |   |    |
| 이 이유 때문에 얼마나 자주 잠자는데 어려움이 있었습니까?                | 1 | 2 | 3 | 4 | 54 |

44) 한 달 동안 잠자리에 드셔서 실제로 잠이 들 때까지 걸린 시간은 평균 어느 정도입니까?

\_\_\_\_\_ 분  
D55-56                      57-58

문 45) 지난 한 달 동안 운전하거나, 식사하실 때, 또는 사회 활동을 하는 동안 얼마나 자주 졸음을 느끼셨습니까?

- 59
1. 번도 없었다
  2. 한 주에 한 번보다 적게
  3. 한 주에 한두 번 정도
  4. 한 주에 세 번 이상

문 46) 지난 한 달 동안, 하는 일에 열중하는데 얼마나 많은 어려움(문제)이 있었습니까?

- 60
1. 전혀 문제 없었다
  2. 약간의 문제가 있었다
  3. 상당히 문제가 있었다
  4. 매우 큰 문제가 있었다

문 47) 지난 한 달 동안, ○○ 님의 전반적인 수면의 질은 어느 정도라고 평가하십니까?

- 61
1. 매우 좋다
  2. 약간 좋다
  3. 약간 나쁘다
  4. 매우 나쁘다

문 48) (보기카드 15 제시)

지난 2 주 동안, 아래 나열되는 증상들을 얼마나 자주 경험하셨습니까? '전혀 없음', '여러 날 동안', '일주일 이상', '거의 매일' 중에서 말씀해 주십시오.

|    |         |        |       |
|----|---------|--------|-------|
| 없음 | 여러 날 동안 | 일주일 이상 | 거의 매일 |
| 0  | 1       | 2      | 3     |

|                                                                          |   |   |   |   |    |
|--------------------------------------------------------------------------|---|---|---|---|----|
| ① 일을 하는 것에 대한 흥미나 재미가 거의 없음                                              | 0 | 1 | 2 | 3 | 62 |
| ② 가려운 느낌, 우울감 혹은 절망감                                                     | 0 | 1 | 2 | 3 | 63 |
| ③ 잠들기 어렵거나 자꾸 깨어남, 혹은 너무 많이 잠                                            | 0 | 1 | 2 | 3 | 64 |
| ④ 피곤, 기력이 저하됨                                                            | 0 | 1 | 2 | 3 | 65 |
| ⑤ 식욕 저하 혹은 과식                                                            | 0 | 1 | 2 | 3 | 66 |
| ⑥ 내 자신이 나쁜 사람이라는 느낌 혹은 내 자신을 실패자라고 느끼거나, 나 때문에 나 자신이나 내 가족이 불행하게 되었다는 느낌 | 0 | 1 | 2 | 3 | 67 |
| ⑦ 신문을 읽거나 TV를 볼 때 집중하기 어려움                                               | 0 | 1 | 2 | 3 | 68 |
| ⑧ 남들이 알아챌 정도로 거동이나 말이 느림 또는 반대로 너무 초조하고 안절부절 못해서 평소보다 많이 돌아다니고 서성거림      | 0 | 1 | 2 | 3 | 69 |
| ⑨ 나는 차라리 죽는 것이 낫겠다는 등의 생각 혹은 어떤 면에서건 나 스스로에게 상처를 주는 생각들                  | 0 | 1 | 2 | 3 | 70 |

49)는 문 48)에서 한 개라도 0점이 아닌 증상이 있는 응답자에게만 질문하고, 모두 0점이면 문 50)으로 가십시오.

문 49) 응답하신 증상(들) 때문에 직장이나 집안일을 하거나 주변 사람들과의 관계에서 얼마나 어려움을 겪으셨습니까?

- 71
1. 전혀 어려움이 없었다
  2. 별로 어려움이 없었다
  3. 어느 정도 어려움이 있었다
  4. 매우 어려움이 있었다

**조사원** 모든 응답자에게 질문

문 50) ○○ 님에게는 **불면증**이 있습니까?

- 72
1. 있다
  2. 없다 → **문 52)로 가십시오**

문 51) (보기카드 16 제시)

그럼, 얼마나 자주 불면증을 경험하시나요?

**1주일 기준**으로 말씀해 주십시오.

- 73
1. 1주일에 1일 미만
  2. 1주일에 1-2일 정도
  3. 1주일에 3-4일 정도
  4. 1주일에 5일 이상

**조사원** 모든 응답자에게 질문

문 52) (보기카드 17 제시)

지난 2주 동안, '잠'에 관한 다음 문제들이 얼마나 심하셨는지, '그렇지 않음', '약간', '중간', '어느 정도 심함', '매우 심함' 중에서 말씀해 주십시오.

| 잠 관련 문제           | 그렇지 않음 | 약간 | 중간 | 어느 정도 심함 | 매우 심함 |    |
|-------------------|--------|----|----|----------|-------|----|
| ① 잠들기 어렵다         | 0      | 1  | 2  | 3        | 4     | 74 |
| ② 잠을 유지하기 어렵다     | 0      | 1  | 2  | 3        | 4     | 75 |
| ③ 일찍 잠이 깬다        | 0      | 1  | 2  | 3        | 4     | 76 |
| ④ 자고 일어나도 개운하지 않다 | 0      | 1  | 2  | 3        | 4     | 77 |

문 53) ○○ 님께서는 자신의 수면 양상에 대해 얼마나 만족하십니까, 혹은 불만족하십니까?

- 78
1. 매우 만족
  2. 약간 만족
  3. 보통이다
  4. 약간 불만족
  5. 매우 불만족

54) ( 18 제시)

○○님의 수면 문제가 어느 정도나 ○○님의 낮 활동을 방해한다고 생각하십니까? (예: 낮에 피곤함, 직장/학교에서 일하는 능력, 집중력, 기억력, 기분 등)

D79

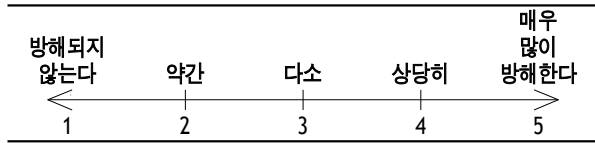

문 55) (보기카드 19 제시)

다른 사람에게 ○○님의 수면 문제로 인해서 ○○님의 삶의 질이 어느 정도나 손상되는 것으로 보일 것이라고 생각하십니까?

80

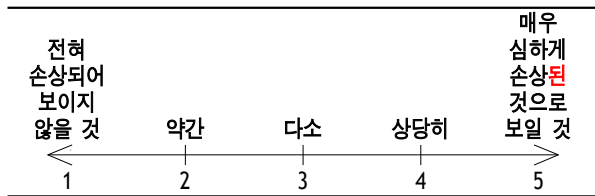

문 56) (보기카드 20 제시)

○○님은 현재 ○○님의 수면 문제에 관하여 얼마나 걱정하십니까?

81

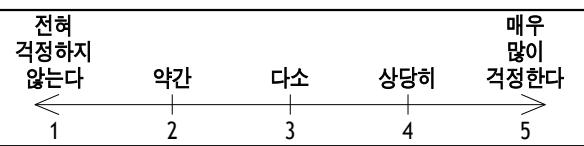

문 57) (보기카드 21 제시)

○○님 가족이나 친척들 중에 불면증으로 고생하시는 분이 계십니까? (계시면) 다음 중에서 해당되는 분을 모두 말씀해 주십시오. (복수응답)

E6

- 1.
2. 할머니
3. 아버지
4. 어머니
5. 남자 형제
6. 여자 자매
7. 자식
8. 사촌 형제 자매
9. 삼촌
10. 고모
11. 외삼촌
12. 이모
13. 조카
14. 기타(적을 것: \_\_\_\_\_)

21

99. 불면증으로 고생하는 가족/친척이 없다

문 58) ○○님께서 주무실 때 코를 끄니까?

22

1. 예
2. 아니오 → **63)으로 가십시오**
3. 모르겠다

문 59) 코고는 소리가 얼마나 심합니까?

23

1. 숨쉬는 소리보다 약간 더 크다
2. 대화하는 소리만큼 크다
3. 대화하는 소리보다 더 크다
4. 아주 시끄럽다(옆방에서 들리는 정도다)

문 60) 얼마나 자주 코를 끄니까?

24

1. 거의 매일
2. 1주일에 3-4회
3. 1주일에 1-2회
4. 한 달에 1-2회

문 61) ○○님의 코골이가 다른 사람의 수면을 방해한다고 생각하십니까?

25

1. 예
2. 아니오
3. 모르겠다

문 62) 주위 분들로부터 ○○님이 '수면 도중 숨을 안 쉬는 경우가 있다'는 말을 들으신 적이 있습니까? (있다면) 그런 경우가 얼마나 자주 있습니까?

26

1. 거의 매일
2. 1주일에 3-4회
3. 1주일에 1-2회
4. 한 달에 1-2회
5. 거의 들어본 적이 없다

조사원      응답자에게 질문

문 63) 아침에 잠에서 깨면 피로를 느끼는 경우가 얼마나 자주 있습니까?

27

1. 거의 매일
2. 1주일에 3-4회
3. 1주일에 1-2회
4. 한 달에 1-2회
5. 거의 또는 전혀 피로하지 않다

문 64) 그럼, 낮에 깨어 있을 때는 피로를 느끼는 경우가 얼마나 자주 있습니까?

28

1. 거의 매일
2. 1주일에 3-4회
3. 1주일에 1-2회
4. 한 달에 1-2회
5. 거의 또는 전혀 피로하지 않다

65) 차를 운전하다 깜빡 존 적이 있습니까?

E29

- 1.
- 2. 아니오
- 3. 운전하지 않음 —

▶ 67)으로 가십시오

문 66) 그런 적이 있다면, 얼마나 자주 그렇습니까?

- 1. 거의 매일
- 2. 1주일에 3-4회
- 3. 1주일에 1-2회
- 4. 한 달에 1-2회
- 5. 한 달에 1-2회보다 적게

조사원 응답자에게 질문

문 67) 질문에는 평소 느끼신 대로 응답해 주십시오.

가만히 앉아 있거나 누워있을 때, 반복적으로 다리에 불편한 느낌(감각)을 경험하신 적이 있습니까?

- 1. 예
- 2. 아니오

문 68) 가만히 앉아 있거나 누워있을 때, 반복적으로 다리를 움직일 필요나 충동을 느끼신 적이 있습니까?

- 1. 예
- 2. 아니오

조사원 문 69)부터 문 79)까지는 문46)67), 문47)68) 중 하나라도 '1. 예', 즉 다리에 문제를 경험한 사람에게만 질문하고 둘 다 '2. 아니오'인 경우는 11페이지 문 80)으로 가십시오.

위에서 언급된 다리의 '느낌'에 관한 질문입니다

조사원 문 67), 문 68)에서 다리 문제 경험자에게만 질문

문 69) 가만히 있을 때(앉거나 누워있기)와 몸을 움직일 때 중, 언제 더 느낍니까?

- 1. 가만히 있을 때
- 2. 움직일 때

문 70) 일어나거나 움직이면, 움직임을 지속하는 동안에는 이런 느낌이 조금이라도 나아집니까?

- 1. 예
- 2. 아니오
- 3. 모르겠다

문 71) 하루 중 언제 이런 느낌이 가장 잘 생깁니까? '아침, 정오, 오후, 저녁, 밤' 중에서 모두 말씀해 주십시오.(복수응답)

- 1. 아침
- 2. 정오
- 3. 오후
- 4. 저녁
- 5. 밤
- 6. 하루 종일 비슷하다

문 72) 계속 움직이지 않더라도 다리 위치를 한번 바꾸면 이런 느낌이 좋아집니까?

- 1. 대개 그렇다
- 2. 대개 그렇지 않다
- 3. 모르겠다

문 73) 이런 느낌이 다리 근육경련(쥐) 때문에 생긴 적이 있습니까?

- 1. 예
- 2. 아니오
- 3. 모르겠다

▶ 문 75)로 가십시오

문 74) 그렇다면, 이런 느낌이 항상 다리 근육경련(쥐) 때문에 생깁니까?

- 1. 예
- 2. 아니오
- 3. 모르겠다

문 75) 이런 느낌이 가만히 앉아 있을 때와 누워있을 때 중에서 언제 생깁니까?

- 1. 앉아있을 때만
- 2. 누워있을 때만
- 3. 앉거나 누워 있을 때 모두
- 4. 두 경우 모두 증상이 없다

문 76) 실제 다리에 이런 느낌이 들 때, 얼마나 불편합니까?

- 1. 별로 불편하지 않다
- 2. 약간 불편하다
- 3. 중간정도 불편하다
- 4. 매우 불편하다

문 77) 지난 1년 동안 다리에 이런 느낌이 얼마나 자주 있었습니까?

- 1. 매일
- 2. 일주일에 4-5일
- 3. 일주일에 2-3일
- 4. 일주일에 1일
- 5. 한 달에 2일
- 6. 한 달에 1일 또는 그 미만
- 7. 한 번도 없었다

문 78) 처음 이런 느낌이 생긴 것은 몇 살 무렵이었습니까?

47-48 \_\_\_\_\_세

문 79) (보기카드 21 제시)

○○ 가족이나 친척들 중에 ○○ 님이 느끼시는 다리 불편감으로 고생하시는 분이 계십니까?  
( ) 다음 중 해당되는 분을 모두 말씀해 주십시오.  
(복수응답)

- E49 1.
- 50 2. 할머니
- 51 3. 아버지
- 52 4. 어머니
- 53 5. 남자 형제
- 54 6. 여자 자매
- 55 7. 자식
- 56 8. 사촌 형제 자매
- 57 9. 삼촌
- 58 10. 고모
- 59 11. 외삼촌
- 60 12. 이모
- 61 13. 조카
- 62-63 14. 기타(적을 것: \_\_\_\_\_)
- 64 99. 다리불편감으로 고생하는 가족/친척이 없다

**응답자에게 질문**

문 80) 지금부터는 평소 건강과 생활습관에 대한 질문입니다.  
○○ 님께서는 평소에 술을 드십니까? 혹은 현재 끊으신 상태입니까, 아니면 원래 술을 안 드십니까?  
(술을 드신다면) 얼마나 자주 드십니까?

- 65 1. 거의 매일
- 2. 1주일에 4-6회 정도
- 3. 1주일에 2-3회 정도
- 4. 1주일에 1회 정도
- 5. 한달에 2-3회 정도
- 6. 한달에 1회 정도
- 7. 술을 끊었다
- 8. 원래 안 마신다

문 81) ○○ 님께서는 평소에 담배를 피우십니까? 혹은 현재 끊으신 상태입니까, 아니면 원래 담배를 안 피우십니까?

- 66 1. 평소에 담배를 피운다
- 2. 담배를 끊었다
- 3. 원래 피우지 않는다

문 82) ○○ 님께서는 평소에 몸에서 땀이 날 정도의 운동을 하십니까? (하신다면) 얼마나 자주 운동을 하십니까?

- 67 1. 거의 매일
- 2. 1주일에 5-6일 정도
- 3. 1주일에 3-4일 정도
- 4. 1주일에 1-2일 정도
- 5. 운동을 하지 않는다

문 83) (보기카드 22 제시)

다음 중 앓으셨거나 앓고 계신 질병을 모두 말씀해 주십시오.  
(앓은 질병 각각에 대해) 그 질병은 몇 세 때 처음 앓으셨습니까?

|                       | 발병 여부 | 최초 발병 나이    |
|-----------------------|-------|-------------|
| ① 뇌졸중<br>(중풍/뇌경색/뇌출혈) | 1 68  | ____세 69-70 |
| ② 심근경색                | 2 71  | ____세 72-73 |
| ③ 말초혈관질환              | 3 74  | ____세 75-76 |
| ④ 협심증                 | 4 77  | ____세 78-79 |
| ⑤ 고혈압                 | 5 80  | ____세 81-82 |
| ⑥ 당뇨                  | 6 83  | ____세 84-85 |
| ⑦ 고지혈증                | 7 86  | ____세 87-88 |
| ⑧ 심장병                 | 8 89  | ____세 90-91 |
| ⑨ 모두 앓은 적 없음          | 9 92  |             |

문 84) 앞에서 제시된 질병 외에 현재 앓고 계신 다른 질병이 있습니까? (있다면) 어떤 질병인지 모두 말씀해 주십시오.

- F6-8 ① \_\_\_\_\_
- 9-11 ② \_\_\_\_\_
- 12-14 ③ \_\_\_\_\_

999. 다른 질병이 없다

문 85) 실례지만, ○○ 님의 키와 몸무게는 얼마입니까?

**조사원 소수점 이하는 반올림해서 정수로 적어주십시오.**

- 15-17 키 :    cm
- 18-20 몸무게 :    kg

**분류용 질문**

질문에 응답해 주셔서 감사합니다.  
마지막으로 자료 분류를 위해 몇 가지만 더 여쭙겠습니다.  
이 항목들은 통계적인 자료 분류 목적 이외에는 결코 사용하지 않을 것을 약속 드립니다.

D 6) 실례지만, ○○ 님은 학교를 어디까지 마치셨습니까?

**조사원** 중되는 졸업에 포함되지 않습니다.

- 26 1. 초등학교 졸업 이하
- 2. 중학교 졸업
- 3. 고등학교 졸업
- 4. 대학 재학/졸업
- 5. 대학원 재학 이상

D 12-2) 그럼, ○○ 님의 한달 평균 총수입은 얼마 정도입니까?  
임대소득, 예금이자 등을 모두 포함한 개인 월평균 총수입을 말씀해 주십시오.

- 1. 월 49만원 이하
- 9. 월 400 - 499만원



- |                  |                   |
|------------------|-------------------|
| 2. 월 50 ~ 99만원   | 10. 월 500 ~ 599만원 |
| 3. 월 100 ~ 149만원 | 11. 월 600 ~ 699만원 |
| 4. 월 150 ~ 199만원 | 12. 월 700 ~ 799만원 |
| 5. 월 200 ~ 249만원 | 13. 월 800 ~ 899만원 |
| 6. 월 250 ~ 299만원 | 14. 월 900 ~ 999만원 |
| 7. 월 300 ~ 349만원 | 15. 월 1,000만원 이상  |
| 8. 월 350 ~ 399만원 | 16. 소득 없음         |

향후 조사 참여 의향이 있는 분에게는 연락처를 좀 더 정확하게 확인하시고, 빠짐없이 기록해 주십시오.  
단, 거절자인 경우에도 면접후기록은 반드시 작성하셔야 합니다.

### 접 후 기 록

|                  |                                                                                                                                                       |       |      |                         |  |
|------------------|-------------------------------------------------------------------------------------------------------------------------------------------------------|-------|------|-------------------------|--|
| 이름               |                                                                                                                                                       |       |      |                         |  |
| 응답자 주소           |                                                                                                                                                       |       |      |                         |  |
| 응답자연락처           | 1. <sup>43-45</sup> <sup>46-49</sup> <sup>50-53</sup><br>(            ) - (            ) - (            )                                             |       |      |                         |  |
|                  | 2. 휴대폰 <sup>54-56</sup> <sup>57-60</sup> <sup>61-64</sup><br>(            ) - (            ) - (            )                                         |       |      |                         |  |
| 조 사 일 시          | <sup>65-66</sup> <sup>67-68</sup><br>_____ 월                    _____ 일                                                                               |       |      |                         |  |
|                  | _____ 시                    _____ 분부터 _____ 시                    _____ 분까지<br>(            분간) <sup>69-70</sup><br>(            실제 응답 소요 시간을 적어 주십시오.) |       |      |                         |  |
| 협 조 정 도          | 1. 상                                                                                                                                                  | 2. 중  | 3. 하 | 71                      |  |
| 응답 신뢰도           | 1. 상                                                                                                                                                  | 2. 중  | 3. 하 | 72                      |  |
| 조사원 이름           |                                                                                                                                                       |       | 지역   | 조사원 ID <sup>73-77</sup> |  |
|                  |                                                                                                                                                       |       |      |                         |  |
| Supervisor       |                                                                                                                                                       | 검 증 원 |      |                         |  |
|                  |                                                                                                                                                       |       |      |                         |  |
| <sup>78-80</sup> |                                                                                                                                                       |       |      |                         |  |
